# Supplementary material
Source: PubMed Central journal article supplement (PMC8043995)
Supplement: NIHMS1636758-supplement-5.pdf [file NIHMS1636758-supplement-5.pdf]

---

|                                            |                                                                                |                 |
|--------------------------------------------|--------------------------------------------------------------------------------|-----------------|
| Journal Name:                              | Nature Biotechnology                                                           | (the 'Journal') |
| Manuscript Number:                         | NBT-RA48762C                                                                   |                 |
| Proposed Title of Article:                 | <b>Identification of highly selective covalent inhibitors by phage display</b> | (the 'Article') |
| Author(s) [Please list all named Authors]: | NBT-RA48762C                                                                   | (the 'Author')  |
| Corresponding Author Name:                 | Matthew Bogyo                                                                  |                 |

## 1 Publication

Springer Nature America, Inc. (the 'Licensee') will consider publishing this article, including any supplementary information and graphic elements therein (e.g. illustrations, charts, moving images) (the 'Article'). Headings are for convenience only.

## 2 Grant of Rights

In consideration of the Licensee evaluating the Article for publication, the Author grants the Licensee the exclusive (except as set out in clauses 3, 4 and 5a) iv) and sub-licensable right, unlimited in time and territory, to copy-edit, reproduce, publish, distribute, transmit, make available and store the Article, including abstracts thereof, in all forms of media of expression now known or developed in the future, including pre- and reprints, translations, photographic reproductions and extensions.

Furthermore, to enable additional publishing services, such as promotion of the Article, the Author grants the Licensee the right to use the Article (including the use of any graphic elements on a stand-alone basis) in whole or in part in electronic form, such as for display in databases or data networks (e.g. the Internet), or for print or download to stationary or portable devices. This includes interactive and multimedia use as well as posting the Article in full or in part or its abstract on social media, and the right to alter the Article to the extent necessary for such use. The Licensee may also let third parties share the Article in full or in part or its abstract on social media and may in this context sub-license the Article and its abstract to social media users. Author grants to Licensee the right to re-license Article metadata without restriction (including but not limited to author name, title, abstract, citation, references, keywords and any additional information as determined by Licensee).

If the Article is rejected by the Licensee and not published, all rights under this agreement shall revert to the Author.

## 3 Self Archiving

Author is permitted to self-archive a preprint and the accepted manuscript version of their Article.

- A preprint is the version of the Article before peer-review has taken place ("Preprint"). Prior to acceptance for publication, Author retains the right to make a Preprint of their Article available on any of the following: their own personal, self-maintained website; a legally compliant Preprint server such as but not limited to arXiv and bioRxiv. Once the Article has been published, the Author should update the acknowledgement and provide a link to the definitive version on the publisher's website: "This is a preprint of an article published in [insert journal title]. The final authenticated version is available online at: [https://doi.org/\[insert DOI\]](https://doi.org/[insert DOI])"
- The accepted manuscript version, by industry standard called the "Author's Accepted Manuscript" ("AAM") is the version accepted for publication in a journal following peer review but prior to copyediting and typesetting that can be made available under the following conditions:  
Author retains the right to make an AAM of the Article available for public release on any of the following 6 months after first publication ("Embargo Period"): their own personal, self-maintained website; their employer's internal website; their institutional and/or funder repositories; AAMs may also be deposited in such repositories immediately on acceptance, provided that they are not made publicly available until after the Embargo Period.

An acknowledgement in the following form should be included, together with a link to the published version on the publisher's website: "This is a post-peer-review, pre-copyedit version of an article published in [insert journal title]. The final authenticated version is available online at: [http://dx.doi.org/\[insert DOI\]](http://dx.doi.org/[insert DOI])".

## 4 Reuse Rights

Author retains the following non-exclusive rights for the published version provided that, when reproducing the Article or extracts from it, the Author acknowledges and references first publication in the Journal according to current citation standards. In any event the acknowledgement should contain as a minimum, "First published in [Journal name, volume, page number, year] by Springer Nature".

- to reuse graphic elements created by the Author and contained in the Article, in presentations and other works created by them;
- the Author and any academic institution where they work at the time may reproduce the Article for the purpose of course teaching (but not for inclusion in course pack material for onward sale by libraries and institutions);

c) to reuse the published version of the Article or any part in a thesis written by the same Author, and to make a copy of that thesis available in a repository of the Author(s)' awarding academic institution, or other repository required by the awarding academic institution. An acknowledgement should be included in the citation: "Reproduced with permission from Springer Nature"; and

d) to reproduce, or to allow a third party to reproduce the Article, in whole or in part, in any other type of work (other than thesis) written by the Author for distribution by a publisher after an embargo period of 12 months.

## 5 Warranties & Representations

Author warrants and represents that:

- a)
  - i. the Author is the sole copyright owner or has been authorised by any additional copyright owner(s) to grant the rights defined in clause 2,
  - ii. the Article does not infringe any intellectual property rights (including without limitation copyright, database rights or trade mark rights) or other third party rights and no licence from or payments to a third party are required to publish the Article,
  - iii. the Article has not been previously published or licensed,
  - iv. if the Article contains materials from other sources (e.g. illustrations, tables, text quotations), Author has obtained written permissions to the extent necessary from the copyright holder(s), to license to the Licensee the same rights as set out in clause 2 and has cited any such materials correctly;
- b) all of the facts contained in the Article are according to the current body of research true and accurate;
- c) nothing in the Article is obscene, defamatory, violates any right of privacy or publicity, infringes any other human, personal or other rights of any person or entity or is otherwise unlawful and that informed consent to publish has been obtained for all research participants;
- d) nothing in the Article infringes any duty of confidentiality which Author might owe to anyone else or violates any contract, express or implied, of Author. All of the institutions in which work recorded in the Article was created or carried out have authorised and approved such research and publication; and
- e) the signatory who has signed this agreement has full right, power and authority to enter into this agreement on behalf of all of the Authors.

## 6 Cooperation

- a) Author shall cooperate fully with the Licensee in relation to any legal action that might arise from the publication of the Article, and the Author shall give the Licensee access at reasonable times to any relevant accounts, documents and records within the power or control of the Author. Author agrees that the distributing entity is intended to have the benefit of and shall have the right to enforce the terms of this agreement.
- b) Author authorises the Licensee to take such steps as it considers necessary at its own expense in the Author's name(s) and on their behalf if the Licensee believes that a third party is infringing or is likely to infringe copyright in the Article including but not limited to initiating legal proceedings.

## 7 Author List

Changes of authorship, including, but not limited to, changes in the corresponding author or the sequence of authors, are not permitted after acceptance of a manuscript.

## 8 Contact Information

Author agrees that the Licensee can share Author contact information with internal colleagues at Springer Nature America, Inc. or its affiliates for the purpose of collaborating on additional works for possible publication.

## 9 Corrections

Author agrees that the Licensee may retract the Article or publish a correction or other notice in relation to the Article if the Licensee considers in its reasonable opinion that such actions are appropriate from a legal, editorial or research integrity perspective.

## 10 Governing Law

This agreement shall be governed by, and shall be construed in accordance with, the laws of the State of New York, without any regard to any conflict of law provisions. The courts of competent jurisdiction in New York, N. Y. shall have the exclusive jurisdiction.

Signed for and on behalf of the Author

Print Name:

Date:

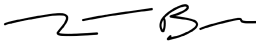

Matthew Bogyo

09/25/2020

Does the Article and/or the Supplementary Information contain material from third parties (including previously published images/figures)?

- Yes (if yes, please ensure copies of the grant of rights are submitted with this form as indicated in the Warranties & Representations clause 5 part (a))
- No

**Note:** if we have requested you to fill out a Third Party Rights table you do not need to attach copies.

Springer Nature America, Inc., One New York Plaza, Suite 4600, New York, NY 10004-1562, USA  
v.2.1 -(09\_2020)-SNA
